# Supplementary material for: A luciferin analogue generating near-infrared bioluminescence achieves highly sensitive deep-tissue imaging
Source: PubMed Central journal article supplement (PMC4911627; doi:10.1038/ncomms11856), 2016-06-14
Supplement: ncomms11856-s1.pdf [file ncomms11856-s1.pdf]

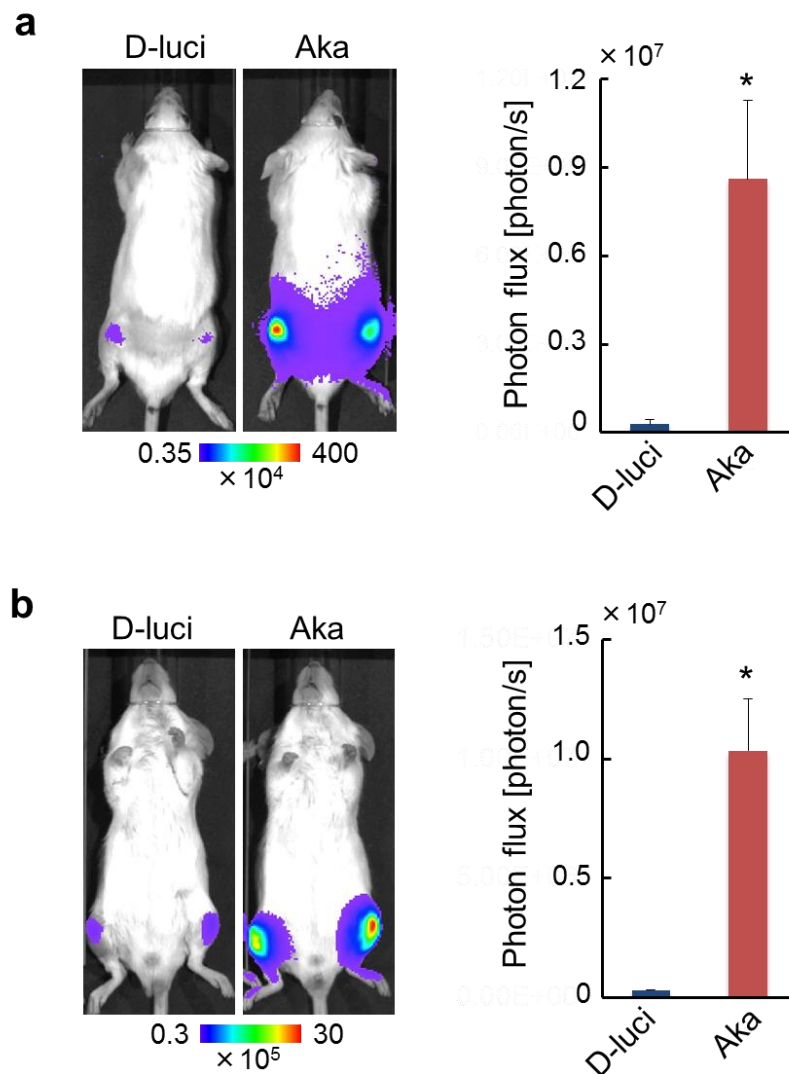

**Supplementary Figure 1 Increased detection sensitivity of luciferase *in vivo* by AkaLumine.** Representative bioluminescence images (left panels) of PC-3/ $\kappa$ B-luc in (a) subcutaneous xenograft and (b) bone metastasis models and quantitative analysis of bioluminescence production (right panels) 15 min after intraperitoneal injection of 100  $\mu$ L of 500  $\mu$ M D-luciferin (D-luci) or AkaLumine (Aka). n=6, \*p<0.05 (t-test). Error bars indicate s.e.m.

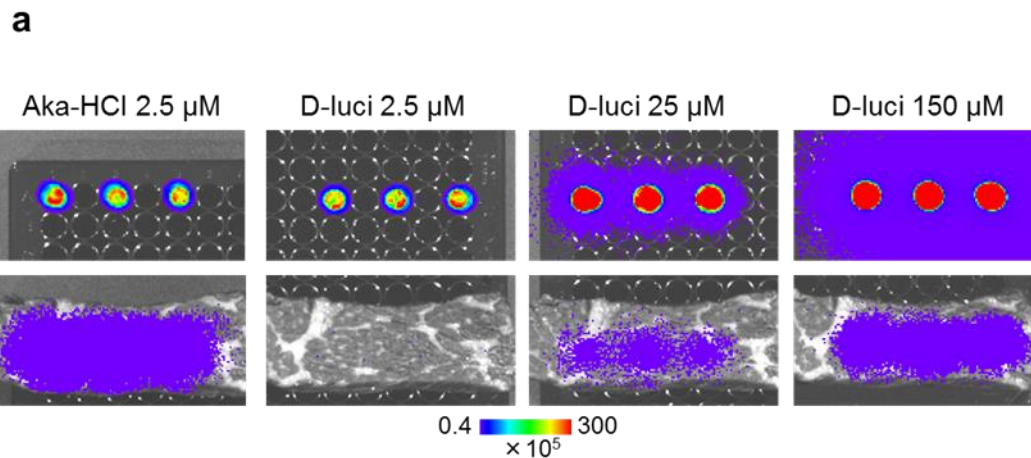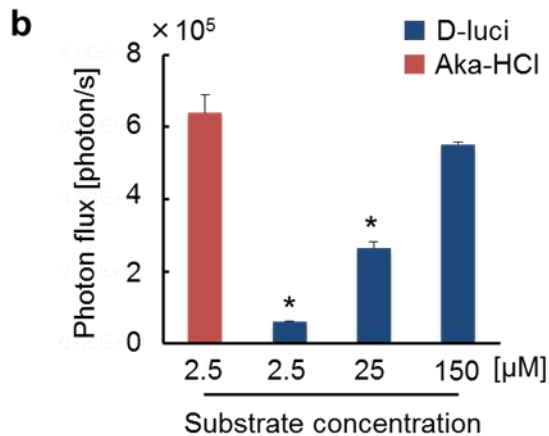

**Supplementary Figure 2 Biological tissue penetration efficiency of bioluminescence.** (a) Bioluminescence images of recombinant Fluc protein in a 96-well plate covered without (top panels) or with (bottom panels) biological tissues (8-mm thick). Recombinant Fluc protein (20  $\mu\text{g}$  per mL) was mixed with indicated substrates in the presence of 20  $\mu\text{M}$  ATP-Mg. (b) Quantitative analysis of transmitted light of the bottom images of (a).  $n=3$ ,  $*p<0.05$  (t-test) to 2.5  $\mu\text{M}$  Aka-HCl. Error bars indicate s.e.m.

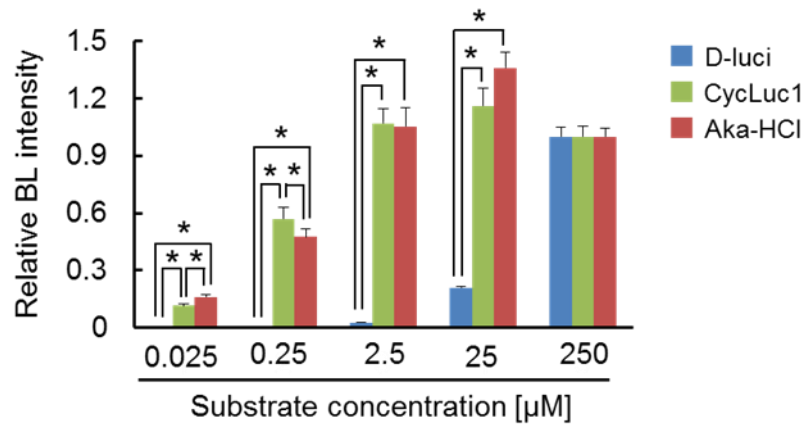

**Supplementary Figure 3 Substrate dose-dependency of bioluminescence production with recombinant Fluc proteins.**

Recombinant Fluc protein (3 μg per mL) was mixed with indicated substrates in the presence of 80 μM ATP-Mg in a 96 well-plate. Bioluminescence (BL) intensity was measured using IVIS-Spectrum with a open filter. Relative BL intensity was calculated by dividing BL intensity of indicated concentration with that of 250 μM. n=3, \*p<0.05 (t-test). Error bars indicate s.e.m.

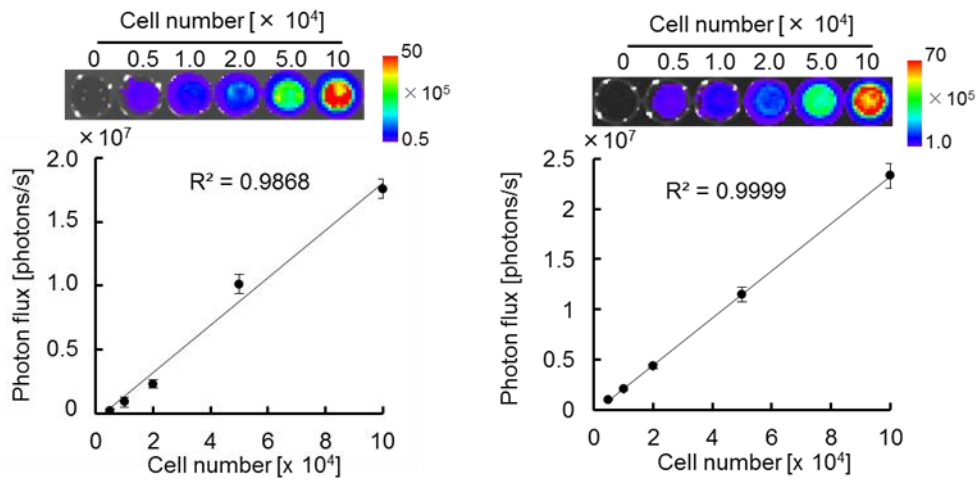

**Supplementary Figure 4 Cellular imaging with AkaLumine-HCl.** Cell number-dependent bioluminescence intensity of LLC/luc (left panel) and MDA-MB-231/luc cells (right panel). Indicated number of the cells were treated with 25  $\mu$ M AkaLumine-HCl. n=3. Error bars indicate s.e.m.

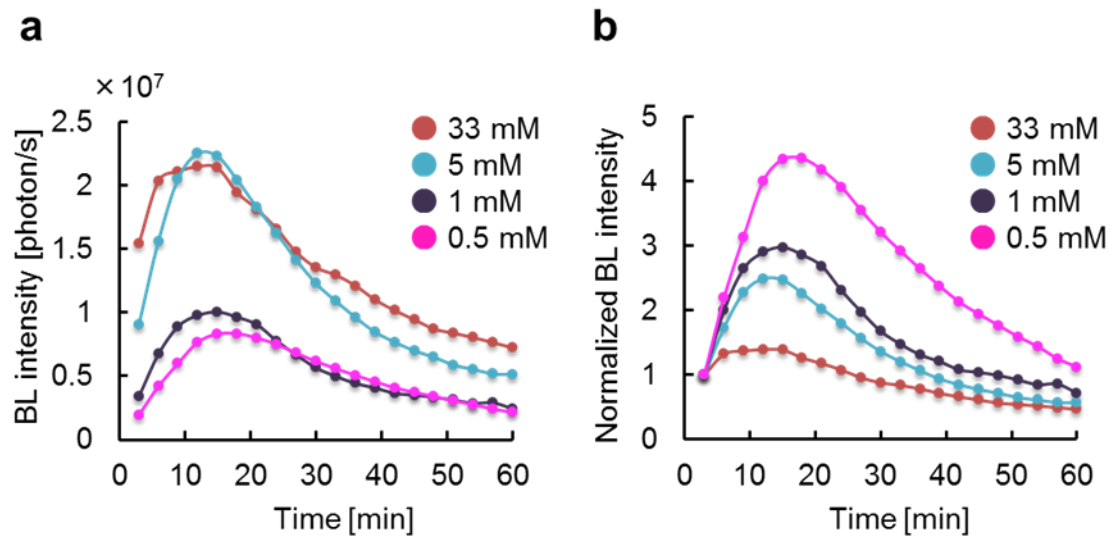

**Supplementary Figure 5 Time course of bioluminescence production *in vivo*.** Representative time course of bioluminescence (BL) production from subcutaneous tumors of LLC/luc. **(a)** BL intensity were measured every 3 min after i.p. injection of 100  $\mu$ L AkaLumine-HCl at indicated concentration. **(b)** BL intensity at each time point was normalized to the ones obtained at 3 min after substrate injection. Data are representative of three independent experiments.

**a**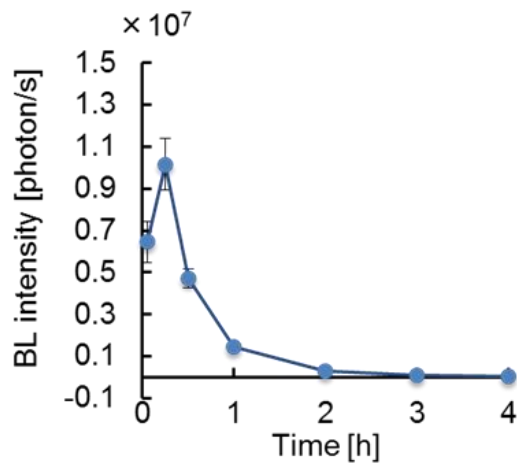**b**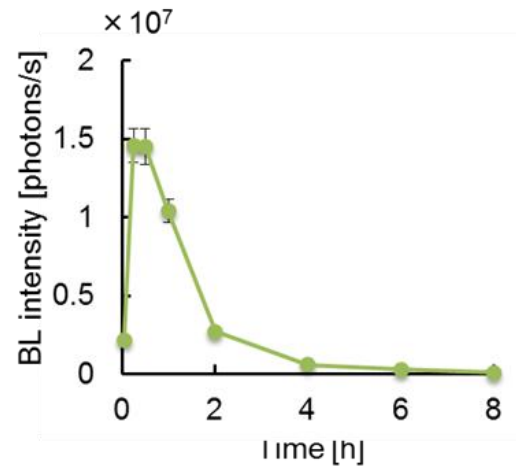

**Supplementary Figure 6 Clearance of bioluminescence from subcutaneous tumor tissue.** (a) Bioluminescence intensity was measured at 3, 15, 30, 60, 120, 180 and 240 min after intraperitoneal injection with 33 mM D-luciferin. (b) Bioluminescence intensity was measured at 3, 15, 30, 60, 240, 360 and 480 min after intraperitoneal injection with 5 mM CycLuc1 into mice with subcutaneous tumors of LLC/luc. n=4.

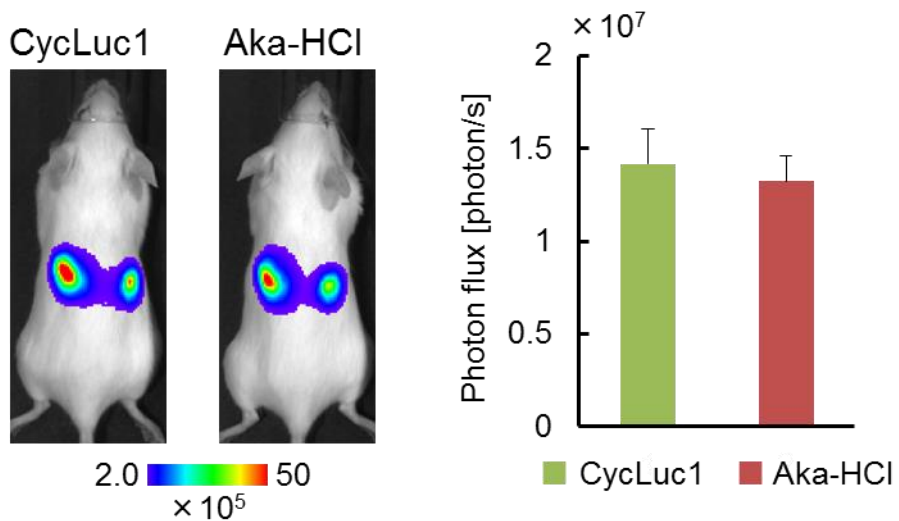

**Supplementary Figure 7 Bioluminescence production in subcutaneous tumors by CycLuc1 and AkaLumine-HCl.** Representative bioluminescence images (left panel) and quantitative analysis (right panel) of bioluminescence imaging of LLC/luc subcutaneous tumors after i.p. injection of the 5 mM substrates into the same mice in order of CycLuc1 and AkaLumine-HCl (Aka-HCl) with 8-h interval. n=6.

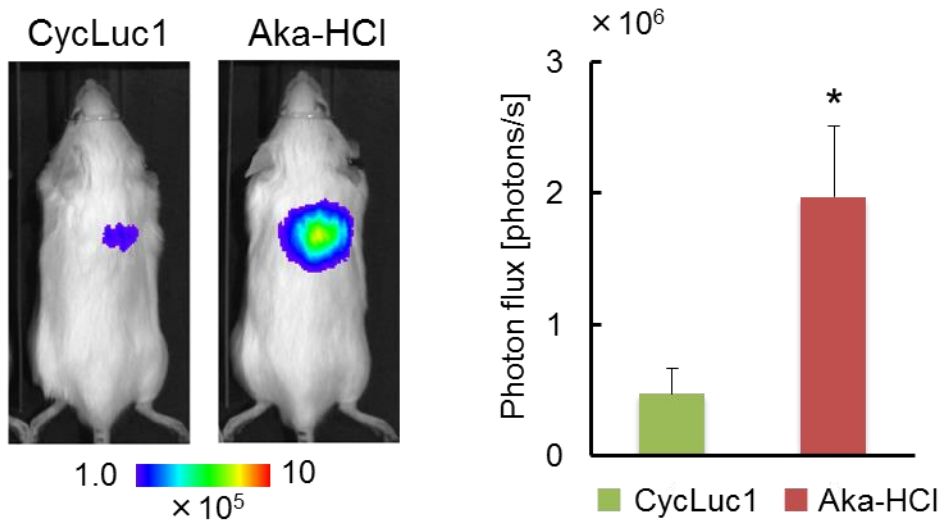

**Supplementary Figure 8 Bioluminescence imaging of lung metastasis.** Representative images (left panel) and quantitative analysis (right panel) of bioluminescence imaging of lung metastasis after i.p. injection of the 5 mM substrate in reverse order of Fig. 5e. n=8, \*p<0.05.
